# Supplementary material
Source: publisher site journal article supplement (https://www.dovepress.com/article/248043)
Supplement: Supplementary file 1 [file get_supplementary_file.php]

**Supplementary data:**

**Figure S1a** Fluorescence amplification pick of *azurin* gene in different isolates, **S1b** Melting curve of amplified *azurin* gene and **S1c** Standard curve for calculating of Blu primer efficiency,  $C_t$  average versus Log of template serial dilution in real-time PCR assay.

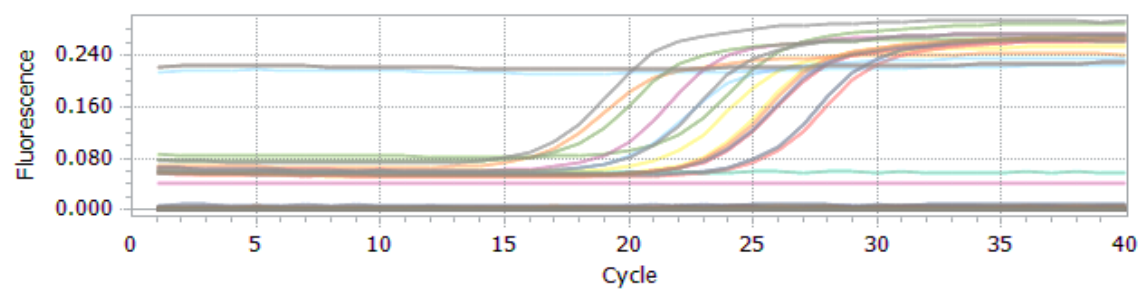

Fig.S1a

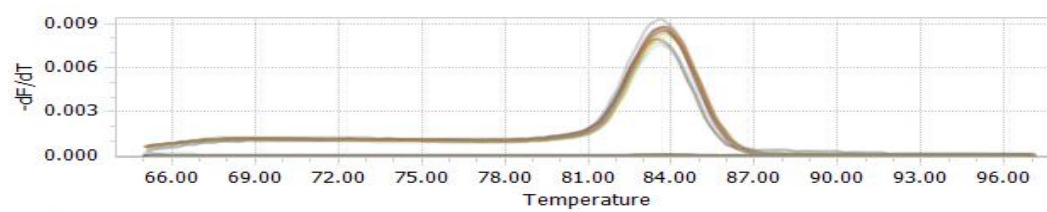

Figure S1b

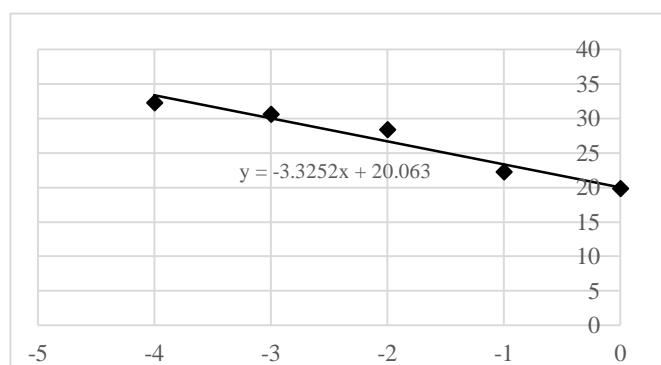

Figure S1c
